# Supplementary material
Source: PubMed Central journal article supplement (PMC3380143)
Supplement: NIHMS375472-supplement-1.pdf [file NIHMS375472-supplement-1.pdf]

**Supplemental Material**

**Whole Genome Expression Differences in Human Left and Right Atria Ascertained by RNA-Sequencing**

**Jeffrey Hsu, BA , Peter Hanna, BA, David R. Van Wagoner, PhD, John Barnard, PhD, David Serre, PhD, Mina K. Chung, MD, and Jonathan D. Smith, PhD**

**Supplemental Figures and Tables:**

**Supplemental Table 1:**Taqman primer and probe design

| <b>Identifier</b>            | <b>Sequence</b>                                             |
|------------------------------|-------------------------------------------------------------|
| <b>Pitx2c Forward Primer</b> | 5'-GCG GTT CCT CTG GAA AGT GG-3'                            |
| <b>Pitx2c Left Primer</b>    | 5'-GCA CAC CAT CTC CGA CAC CT-3'                            |
| <b>Probe*</b>                | 5'-/56-FAM/CCC GGA GGC /ZEN/CGC AGA GAA AGATAA /3IABkFQ/-3' |

\*Fam fluorophore with Internal Zen and 3' Iowa Black FQ quencher modifications

**Supplemental Table 2: Sample Summary**

| Sample ID | Age | Gender | AF status     | Procedures (cardiac diagnoses)                           | LVEF    | LA area, cm <sup>2</sup> |
|-----------|-----|--------|---------------|----------------------------------------------------------|---------|--------------------------|
| 1         | 63  | M      | Permanent AF* | Mitral valve repair, CABG, Maze (4+ MR, CAD)             | 65%     | 32                       |
| 2         | 64  | F      | Permanent AF* | Mitral and tricuspid valve repair, Maze (4+ MR, 2-3+TR)) | 70%     | 45                       |
| 3         | 32  | F      | None†         | unused tissue donor                                      | unknown | unknown                  |
| 4         | 55  | M      | Permanent AF* | Mitral valve repair, CABG, Maze (flail 4+MR, CAD)        | 55%     | 52                       |

\* Permanent AF diagnosis and AF during surgery

†No history of atrial fibrillation presumed

**Supplemental Table 3: Sequencing Summary of the miRNA reads.**

| ID | Tissue | Number of Clusters (x 10 <sup>6</sup> ) | Aligned Uniquely (x 10 <sup>6</sup> ) | %Aligned Uniquely | Aligned to known miRNA (x 10 <sup>6</sup> ) | % Aligned to miRBase * |
|----|--------|-----------------------------------------|---------------------------------------|-------------------|---------------------------------------------|------------------------|
| 1  | Right  | 33.2                                    | 11.3                                  | 34.1%             | 11.6                                        | 35.1%                  |
| 1  | Left   | 30.9                                    | 12.0                                  | 38.7%             | 12.7                                        | 41.0%                  |
| 2  | Right  | 33.4                                    | 11.8                                  | 35.5%             | 14.9                                        | 44.7%                  |
| 2  | Left   | 34.1                                    | 8.9                                   | 26.2%             | 14.2                                        | 41.6%                  |
| 3  | Right  | 32.3                                    | 13.5                                  | 41.8%             | 17.1                                        | 53.0%                  |
| 3  | Left   | 29.4                                    | 12.3                                  | 42.0%             | 11.3                                        | 38.4%                  |
| 4  | Right  | 28.6                                    | 9.4                                   | 33.0%             | 7.7                                         | 27.2%                  |
| 4  | Left   | 27.1                                    | 10.1                                  | 37.2%             | 7.7                                         | 28.5%                  |

\*In order to account for reads that aligned to multiple mature miRNAs, reads were aligned to only miRBase annotated hairpins and collapsed to their mature miRNAs.

**Supplemental Table 4:** Sequencing Summary of the mRNA reads.

| Sample ID | Tissue | Number of Clusters (x 10 <sup>6</sup> ) | % of total that are properly aligned* | Mapped to RefSeq transcripts (x 10 <sup>6</sup> ) | % of total reads that mapped to RefSeq |
|-----------|--------|-----------------------------------------|---------------------------------------|---------------------------------------------------|----------------------------------------|
| 1         | Right  | 29.5                                    | 88%                                   | 20.8                                              | 70%                                    |
| 1         | Left   | 27.2                                    | 83%                                   | 17.7                                              | 65%                                    |
| 2         | Right  | 35.4                                    | 89%                                   | 28.6                                              | 81%                                    |
| 2         | Left   | 24.3                                    | 86%                                   | 16.3                                              | 67%                                    |
| 3         | Right  | 37.6                                    | 89%                                   | 29.9                                              | 79%                                    |
| 3         | Left   | 31.1                                    | 88%                                   | 21.0                                              | 67%                                    |
| 4         | Right  | 33.4                                    | 85%                                   | 21.4                                              | 64%                                    |
| 4         | Left   | 41.1                                    | 70%                                   | 19.2                                              | 47%                                    |

\* Paired ends were aligned at the same locus in convergent orientations.

**Supplemental Table 5.** Highest expressed miRNAs in the left and right atria.

| <b>Left Atria</b> | <b>% Total miRNAs reads</b> | <b>SD</b> | <b>Right atria</b> | <b>% Total miRNAs reads</b> | <b>SD</b> |
|-------------------|-----------------------------|-----------|--------------------|-----------------------------|-----------|
| hsa-miR-143       | 32.7                        | 1.5       | hsa-miR-143        | 26.7                        | 1.8       |
| hsa-miR-378       | 11.0                        | 3.3       | hsa-miR-24         | 9.4                         | 1         |
| hsa-miR-24        | 8.7                         | 2.4       | hsa-miR-378        | 8.6                         | 1.6       |
| hsa-miR-1         | 7.1                         | 2.5       | hsa-miR-1          | 6.4                         | 1.3       |
| hsa-miR-30d       | 3.9                         | 1.1       | hsa-miR-30d        | 3.9                         | 0.9       |
| hsa-miR-21        | 3.0                         | 0.4       | hsa-let-7f         | 2.8                         | 0.4       |

**Supplemental Table 6:** Top 10 left-right atria differentially regulated GO terms.

| <b>GO Term</b>                                                            | <b>Right*</b> | <b>Left*</b> | <b>Hypothesis</b> |
|---------------------------------------------------------------------------|---------------|--------------|-------------------|
| SIGNAL TRANSDUCTION                                                       | 205           | 94           | Enriched in RA    |
| INTRINSIC TO MEMBRANE                                                     | 203           | 82           | Enriched in RA    |
| INTEGRAL TO MEMBRANE                                                      | 198           | 79           | Enriched in RA    |
| CELL SURFACE RECEPTOR<br>LINKED SIGNAL TRANSDUCTION                       | 102           | 38           | Enriched in RA    |
| RECEPTOR ACTIVITY                                                         | 97            | 30           | Enriched in RA    |
| NUCLEOBASE NUCLEOSIDE<br>NUCLEOTIDE AND NUCLEIC<br>ACID METABOLIC PROCESS | 94            | 51           | Enriched in RA    |
| REGULATION OF METABOLIC<br>PROCESS                                        | 80            | 35           | Enriched in RA    |
| REGULATION OF CELLULAR<br>METABOLIC PROCESS                               | 78            | 34           | Enriched in RA    |
| TRANSCRIPTION                                                             | 69            | 28           | Enriched in RA    |
| REGULATION OF GENE<br>EXPRESSION                                          | 67            | 25           | Enriched in RA    |
| CYTOPLASM                                                                 | 128           | 133          | Enriched in LA    |
| CYTOPLASMIC PART                                                          | 74            | 93           | Enriched in LA    |
| ORGANELLE PART                                                            | 46            | 77           | Enriched in LA    |
| INTRACELLULAR ORGANELLE<br>PART                                           | 46            | 77           | Enriched in LA    |
| PROTEIN METABOLIC PROCESS                                                 | 116           | 70           | Enriched in LA    |
| CELLULAR PROTEIN METABOLIC<br>PROCESS                                     | 99            | 63           | Enriched in LA    |
| CELLULAR MACROMOLECULE<br>METABOLIC PROCESS                               | 99            | 63           | Enriched in LA    |
| MACROMOLECULAR COMPLEX                                                    | 55            | 56           | Enriched in LA    |
| MITOCHONDRION                                                             | 6             | 52           | Enriched in LA    |
| PROTEIN COMPLEX                                                           | 54            | 47           | Enriched in LA    |

Genesets were ordered with the highest number of up regulated genes in the right or left atria at the top, and by having the minimum p-value ( $10^{-4}$ ) under the up or down hypothesis.

\*Number of genes from the geneset that are contained within those found to be expressed higher in the left or right atria via the edgeR analysis (FDR < 0.05).

**Supplemental Table7. Left-right atrial expression differences in transcripts close to SNPs associated with atrial fibrillation or PR interval identified through genome wide association studies.**

| Top Associated SNP | Reference | Gene     | Expressed in Atria | L-R difference (FDR) | Expressed Higher |
|--------------------|-----------|----------|--------------------|----------------------|------------------|
| rs2200733          | (1)       | PITX2    | Yes                | 5.20E-68             | Left             |
| rs1337633          | (2)       | KCNN3    | No                 | NS                   |                  |
|                    |           | PMVK     | Yes                | NS                   |                  |
|                    |           | ADAR     | Yes                | NS                   |                  |
|                    |           | CHRNA2   | No                 | NS                   |                  |
| rs1303809          | (2)       | SULF2    | Yes                | 0.004                | Right            |
|                    |           | NCOA3    | Yes                | NS                   |                  |
| rs2106261          | (3)       | ZFH3     | Yes                | NS                   |                  |
|                    |           | HTA      | No                 | NS                   |                  |
| rs1737590          | (3)       | MTHFR    | Yes                | NS                   |                  |
|                    |           | CCLCN6   | NA                 | NS                   |                  |
| rs11897119         | (4)       | MEIS1    | Yes                | NS                   |                  |
| rs11708996         | (4)       | SCN5A    | Yes                | NS                   |                  |
| rs6800541          | (4)       | SCN10A   | No                 | NS                   |                  |
| rs7692808          | (4)       | ARHGAP24 | Yes                | NS                   |                  |
| rs251253           | (4)       | NKX2-5   | Yes                | NS                   |                  |
| rs3807989          | (4)       | CAV1     | Yes                | NS                   |                  |
|                    |           | CAV2     | Yes                | NS                   |                  |
| rs4944092          | (4)       | WNT11    | Yes                | 0.04                 | Right            |
| rs11047543         | (4)       | SOX5     | No                 | NS                   |                  |
| rs1896312          | (4)       | TBX5     | Yes                | NS                   |                  |
|                    |           | TBX3     | Yes                | NS                   |                  |



**Supplemental Table 8. Left-right atrial miRNA expression differences after removing the non-atrial fibrillation sample #3.** Of the top 26 miRNAs found to be significantly differentially expressed at the FDR 0.05 level using only the three AF sample pairs, 21 were found to be significantly differentially expressed using all four sample pairs (Table 1 in the manuscript).

| miRNA           | logConc | logFC | LR    | P.Value  | adj.P.Val | All samples (rank order) |
|-----------------|---------|-------|-------|----------|-----------|--------------------------|
| hsa-miR-135b    | -11.40  | -3.16 | 79.03 | 6.13E-19 | 1.84E-16  | 3                        |
| hsa-miR-10b     | -7.35   | -2.21 | 50.59 | 1.14E-12 | 2.28E-10  | 1                        |
| hsa-miR-215     | -10.65  | -1.75 | 35.57 | 2.46E-09 | 3.68E-07  | #N/A                     |
| hsa-miR-100     | -4.35   | 1.58  | 34.21 | 4.95E-09 | 5.94E-07  | 2                        |
| hsa-miR-487a    | -11.22  | -1.25 | 19.27 | 1.13E-05 | 5.23E-04  | 4                        |
| hsa-miR-31      | -9.25   | -1.62 | 17.52 | 2.84E-05 | 1.14E-03  | #N/A                     |
| hsa-miR-4792    | -7.93   | -1.23 | 16.31 | 5.38E-05 | 1.90E-03  | 25                       |
| hsa-miR-9       | -9.01   | 1.02  | 15.58 | 7.92E-05 | 2.38E-03  | 10                       |
| hsa-miR-217     | -9.89   | -1.74 | 15.24 | 9.47E-05 | 2.71E-03  | #N/A                     |
| hsa-miR-708     | -9.66   | -1.01 | 14.78 | 1.21E-04 | 3.30E-03  | 18                       |
| hsa-miR-4448    | -11.11  | 0.97  | 10.64 | 1.11E-03 | 2.21E-02  | 5                        |
| hsa-miR-24-1*   | -9.06   | -0.94 | 10.33 | 1.31E-03 | 2.32E-02  | 21                       |
| hsa-miR-125b-1* | -10.64  | 0.87  | 10.32 | 1.32E-03 | 2.32E-02  | 12                       |
| hsa-miR-216a    | -10.56  | -1.59 | 10.00 | 1.57E-03 | 2.61E-02  | #N/A                     |
| hsa-miR-585     | -11.00  | 0.91  | 9.99  | 1.57E-03 | 2.61E-02  | 6                        |
| hsa-miR-1275    | -11.01  | 0.87  | 9.95  | 1.61E-03 | 2.61E-02  | 7                        |
| hsa-miR-1247    | -13.55  | 1.47  | 9.85  | 1.70E-03 | 2.69E-02  | #N/A                     |
| hsa-miR-329     | -11.97  | -0.94 | 9.70  | 1.85E-03 | 2.84E-02  | #N/A                     |
| hsa-miR-425     | -6.90   | -0.80 | 9.57  | 1.98E-03 | 2.91E-02  | 14                       |
| hsa-miR-708*    | -12.54  | -1.03 | 9.56  | 1.99E-03 | 2.91E-02  | 18                       |
| hsa-miR-1270    | -13.00  | 1.17  | 9.36  | 2.22E-03 | 3.16E-02  | #N/A                     |
| hsa-miR-483-3p  | -11.77  | -0.95 | 9.29  | 2.30E-03 | 3.16E-02  | #N/A                     |
| hsa-miR-483-5p  | -10.62  | -0.92 | 9.28  | 2.31E-03 | 3.16E-02  | 8                        |
| hsa-miR-1248    | -12.61  | 1.12  | 9.21  | 2.41E-03 | 3.17E-02  | #N/A                     |
| hsa-miR-92b*    | -12.49  | 1.17  | 9.19  | 2.43E-03 | 3.17E-02  | 16                       |
| hsa-miR-9*      | -11.48  | 0.87  | 9.14  | 2.50E-03 | 3.19E-02  | 10                       |
| hsa-miR-155     | -9.02   | 0.84  | 9.05  | 2.63E-03 | 3.29E-02  | 23                       |
| hsa-miR-4497    | -10.00  | 0.88  | 8.91  | 2.84E-03 | 3.48E-02  | 13                       |
| hsa-miR-376c    | -9.62   | -0.83 | 8.74  | 3.11E-03 | 3.73E-02  | 24                       |
| hsa-miR-150     | -8.93   | -0.76 | 8.61  | 3.34E-03 | 3.93E-02  | 17                       |
| hsa-miR-410     | -11.03  | -0.84 | 8.55  | 0.003454 | 0.039855  | #N/A                     |
| hsa-miR-125b    | -4.99   | 0.75  | 8.50  | 0.003561 | 0.040311  | 15                       |

**Supplemental Table 9. Left-right atrial mRNA expression differences after removing the non-atrial fibrillation sample #3.** The rank order of the top 10 significantly differentially expressed mRNA excluding sample #3 were compared to the rank order in which all samples were used (Table 2 in the manuscript). Although the rank ordering does change, all the significant genes within the top 10 are also significant in the previous analysis, and the top 3 genes remain the same.

|                | logConc | logFC | LR     | P.Value  | adj.P.Val | All samples<br>(rank order) | adj.P.Val |
|----------------|---------|-------|--------|----------|-----------|-----------------------------|-----------|
| <b>BMP10</b>   | -7.52   | 7.85  | 439.95 | 1.11E-97 | 1.69E-93  | 2                           | 1.24E-92  |
| <b>HAMP</b>    | -9.84   | 7.08  | 347.37 | 1.58E-77 | 1.20E-73  | 1                           | 2.77E-107 |
| <b>PITX2</b>   | -11.69  | -6.26 | 226.27 | 3.88E-51 | 1.96E-47  | 3                           | 5.20E-68  |
| <b>MSLN</b>    | -9.89   | -4.84 | 177.85 | 1.43E-40 | 5.42E-37  | 37                          | 3.14E-18  |
| <b>ANXA8L2</b> | -10.34  | -4.86 | 174.39 | 8.15E-40 | 2.19E-36  | 175                         | 5.51E-09  |
| <b>ANXA8</b>   | -10.38  | -4.85 | 174.27 | 8.63E-40 | 2.19E-36  | 135                         | 6.15E-10  |
| <b>ANXA8L1</b> | -10.38  | -4.85 | 173.93 | 1.03E-39 | 2.23E-36  | 136                         | 6.15E-10  |
| <b>C2orf14</b> | -12.17  | 6.76  | 165.99 | 5.57E-38 | 1.06E-34  | 4                           | 5.13E-45  |
| <b>SYT4</b>    | -11.54  | -5.29 | 138.03 | 7.18E-32 | 1.21E-28  | 16                          | 2.17E-23  |
| <b>COMP</b>    | -11.41  | -3.87 | 137.61 | 8.87E-32 | 1.35E-28  | 163                         | 2.32E-09  |

**Supplemental Table 10. Left-right atrial non-coding RNA expression differences from Table 5 after removing the non-atrial fibrillation sample #3.**

| Transcript boundary       | Nearest gene    | Exons | Absolute Fold Change | Expressed Higher | Significant |
|---------------------------|-----------------|-------|----------------------|------------------|-------------|
| chr12:114883593-114885094 | <i>TBX5</i>     | 2     | 1.498767             | Right            | yes         |
| chr6:36810354-36812333    | <i>CPNE5</i>    | 2     | 2.122528             | Left             | yes         |
| chr12:58325277-58329330   | <i>XRCC6BP1</i> | 2     | No test*             | No Test          | No test     |
| chr2:27939711-27961143    | <i>SLC4A1</i>   | 2     | 1.93741              | Left             | yes         |
| chr2:50999236-51003553    | <i>NRXN1*</i>   | 2     | 1.363425             | Left             | yes         |
| chr19:50989460-51003531   | <i>JOSD2</i>    | 3     | 1.993716             | Right            | yes         |
| chr15:25243485-25247622   | <i>SNOR108</i>  | 4     | 2.033991             | Right            | yes         |
| chr19:50990647-50999173   | <i>C19orf63</i> | 2     | 2.823564             | Right            | yes         |
| chr16:58467328-58496760   | <i>NDRG4</i>    | 3     | 2.001826             | Left             | yes         |
| chr13:114054026-114066562 | <i>ADPRHL1</i>  | 2     | 1.221271             | Left             | yes         |
| chr19:50991540-51005189   | <i>JOSD2</i>    | 2     | 1.733253             | Left             | yes         |

\*, After removal of sample pair #3, this transcript had  $\leq 10$  reads across the three remaining sample pairs and was excluded in the Cuffdiff program within Cufflinks from differential transcript isoform calling between the left and right atria.

**Supplemental Figure 1:** *PITX2* is expressed specifically in the left atria. There are three common *PITX2* splice isoforms, and of the isoform specific splice junctions (reads highlighted in light blue), only evidence for *PITX2c* expression was observed.

[0 - 10]

## Right Atria

[0 - 10]

[0 - 10]

[0 - 10]

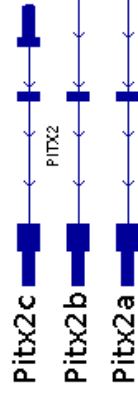

[0 - 48]

## Left Atria

[0 - 30]

[0 - 6]

[0 - 75]

PITX2

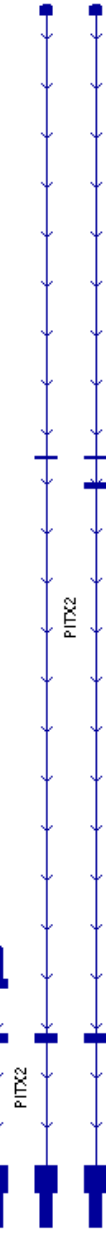

**Supplemental Figure 2:** Non-coding RNAs by TBX5. TCONS\_00077436 was found to be differentially expressed between the left and right atria.

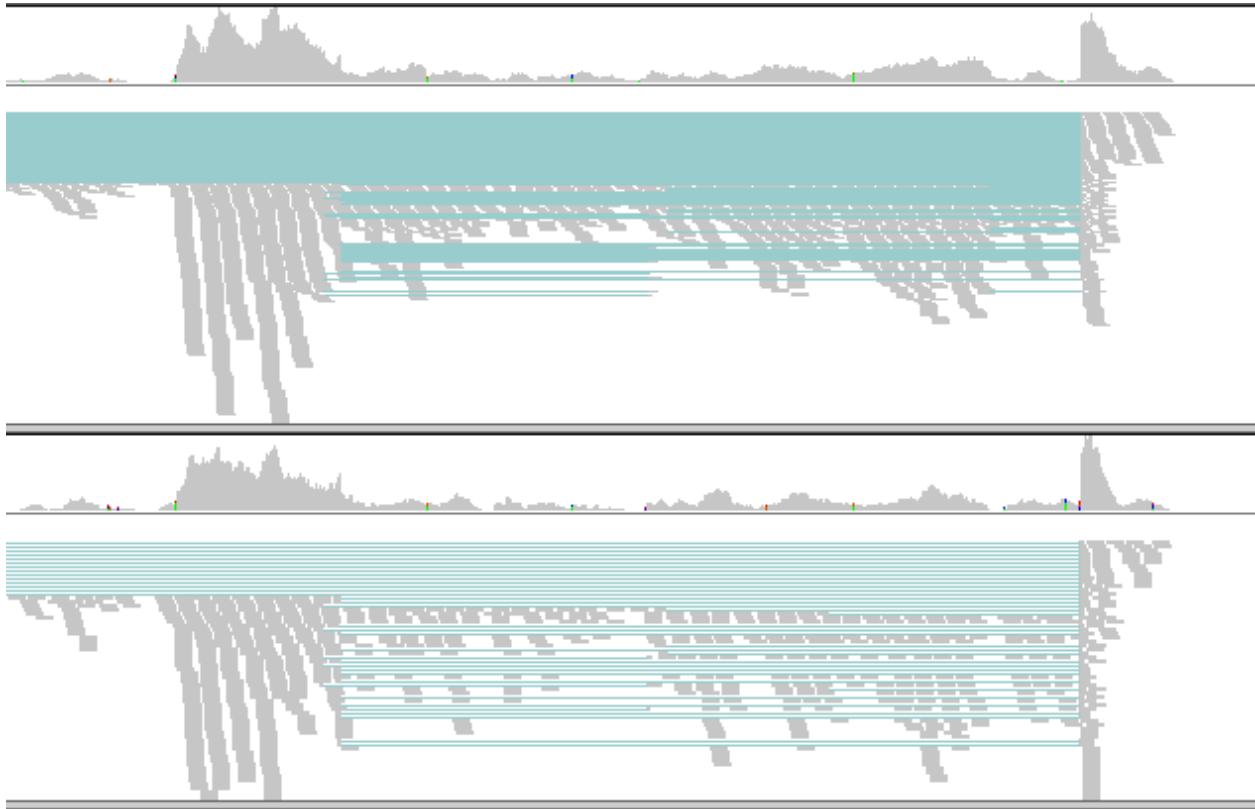

**Non-coding RNAs by TBX5**

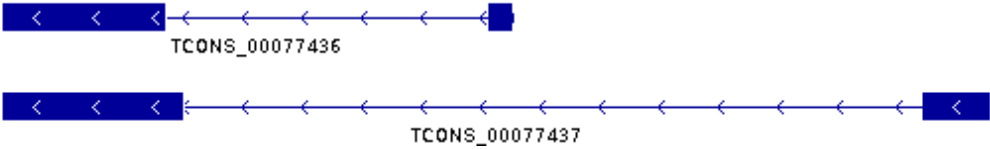

## Supplemental References

1. Gudbjartsson DF, Arnar DO, Helgadóttir A, Gretarsdóttir S, Holm H, Sigurdsson A, Jonasdóttir A, Baker A, Thorleifsson G, Kristjansson K, Palsson A, Blondal T, Sulem P, Backman VM, Hardarson G a, Palsdóttir E, Helgason A, Sigurjonsdóttir R, Sverrisson JT, Kostulas K, Ng M CY, Baum L, So WY, Wong KS, Chan JCN, Furie KL, Greenberg SM, Sale M, Kelly P, MacRae C a, Smith EE, Rosand J, Hillert J, Ma RCW, Ellinor PT, Thorgeirsson G, Gulcher JR, Kong A, Thorsteinsdóttir U, Stefansson K. Variants conferring risk of atrial fibrillation on chromosome 4q25. *Nature*. 2007; 448:353-357.
2. Ellinor PT, Lunetta KL, Glazer NL, Pfeufer A, Alonso A, Chung MK, Sinner MF, de Bakker PIW, Mueller M, Lubitz S a, Fox E, Darbar D, Smith NL, Smith JD, Schnabel RB, Soliman EZ, Rice KM, Van Wagoner DR, Beckmann B-M, van Noord C, Wang K, Ehret GB, Rotter JI, Hazen SL, Steinbeck G, Smith AV, Launer LJ, Harris TB, Makino S, Nelis M, Milan DJ, Perz S, Esko T, Köttgen A, Moebus S, Newton-Cheh C, Li M, Möhlenkamp S, Wang TJ, Kao WHL, Vasan RS, Nöthen MM, MacRae C a, Stricker BHC, Hofman A, Uitterlinden AG, Levy D, Boerwinkle E, Metspalu A, Topol EJ, Chakravarti A, Gudnason V, Psaty BM, Roden DM, Meitinger T, Wichmann H-E, Witteman JCM, Barnard J, Arking DE, Benjamin EJ, Heckbert SR, Kääh S. Common variants in KCNN3 are associated with lone atrial fibrillation. *Nat Genet*. 2010; 42:240-4.
3. Benjamin EJ, Rice KM, Arking DE, Pfeufer A, van Noord C, Smith AV, Schnabel RB, Bis JC, Boerwinkle E, Sinner MF, Dehghan A, Lubitz S a, D'Agostino RB, Lumley T, Ehret GB, Heeringa J, Aspelund T, Newton-Cheh C, Larson MG, Marciante KD, Soliman EZ, Rivadeneira F, Wang TJ, Eiríksdóttir G, Levy D, Psaty BM, Li M, Chamberlain AM, Hofman A, Vasan RS, Harris TB, Rotter JI, Kao WHL, Agarwal SK, Stricker BHC, Wang K, Launer LJ, Smith NL, Chakravarti A, Uitterlinden AG, Wolf P a, Sotoodehnia N, Köttgen A, van Duijn CM, Meitinger T, Mueller M, Perz S, Steinbeck G, Wichmann H-E, Lunetta KL, Heckbert SR, Gudnason V, Alonso A, Kääh S, Ellinor PT, Witteman JCM. Variants in ZFX3 are associated with atrial fibrillation in individuals of European ancestry. *Nat Genet*. 2009; 41:879-81.
4. Holm H, Gudbjartsson DF, Arnar DO, Thorleifsson G, Thorgeirsson G, Stefansdóttir H, Gudjonsson S a, Jonasdóttir A, Mathiesen EB, Njølstad I, Nyrnes A, Wilsgaard T, Hald EM, Hveem K, Stoltenberg C, Løchen M-L, Kong A, Thorsteinsdóttir U, Stefansson K. Several common variants modulate heart rate, PR interval and QRS duration. *Nat Genet*. 2010; 42:117-122.
